# Supplementary material for: Intrinsic and Extrinsic Factors Affecting the Color of Fresh Beef Meat—Comprehensive Review
Source: MDPI journal article supplement (doi:10.3390/app13074382), 2023-03-30
Supplement: s1 [file s1]

**Table S1:** Summary of the papers related to the influence of intrinsic factors on meat color.

| Main Topic         | Implications                                                                                                                                                                                                           | Publication |
|--------------------|------------------------------------------------------------------------------------------------------------------------------------------------------------------------------------------------------------------------|-------------|
| Ultimate pH        | Higher ultimate pH in meat is related to lower glucidic potential and lactate amounts, which can be affected by inadequate pre-mortem management of the animals                                                        | [44]        |
|                    | Ultimate pH in meat is the most important discriminant in determining the final color of meat                                                                                                                          | [2]         |
|                    | Higher ultimate pH in DFD meat was negatively related to glycolytic potential, color values, and oxymyoglobin concentration in meat, and positively related to deoxymyoglobin concentration and water-holding capacity | [24]        |
|                    | Intermediate pH beef was associated with higher phosphorylation rates of myofibrillar proteins that could inhibit post-mortem proteolysis                                                                              | [30]        |
|                    | Higher mitochondrial content and higher mitochondrial activity in DFD beef could influence oxygen consumption and myoglobin oxygenation                                                                                | [13]        |
|                    | DFD severity degree showed a negative relationship with the glycolytic potential and lactate formation in post-mortem muscle and resulted in lower CIELab values in meat                                               | [25]        |
|                    | DFD meat had overall lower light reflectance, higher light absorbance, higher MRA, and lower lipid oxidation than normal-pH meat                                                                                       | [27]        |
|                    | DFD meat had a wider lateral spacing of myofilaments and a lack of gaps between muscle fibers, which created less light scattering from the meat muscle                                                                | [28]        |
|                    | Infrared temperature determination showed inconsistent results in predicting ultimate pH values and color in beef muscle                                                                                               | [34]        |
| Age of the animals | Increased myoglobin amounts in tissues of older animals resulted in higher a* values                                                                                                                                   | [40]        |
|                    | Older animals produced higher iron contents in meat than younger animals, due to a more oxidative metabolism                                                                                                           | [27]        |
|                    | The lower growth rate in pasture-fed steers produced older animals with more oxidative muscles, which were responsible for altering the color of meat                                                                  | [63]        |
|                    | Increasing the slaughter age in cattle produced higher amounts of slow oxidative muscle fibers and less fast glycolytic fibers, which resulted in lower meat color values                                              | [36]        |

|                        |                                                                                                                                                                                               |      |
|------------------------|-----------------------------------------------------------------------------------------------------------------------------------------------------------------------------------------------|------|
|                        | Increasing the slaughter age (three months on average) produced meat with lower L* and higher a* and b* values, due to higher pH in the meat of old animals                                   | [39] |
|                        | Steers slaughtered at 30 months of age produced higher pH and a*, but lower L* values than steers harvested at 18 months of age                                                               | [42] |
|                        | Increasing the slaughter age in German Simmental cattle produced higher L* and had variable effects on a* values                                                                              | [41] |
|                        | Increasing the slaughter age in cattle produced higher catalase, superoxide dismutase, and glutathione peroxidase activity, which was not enough for preventing oxidation processes in muscle | [35] |
| <b>Muscle position</b> | Improved LDH-B activity, MRA, and higher NADH concentrations in LL muscles were responsible for better color than in SM or PM                                                                 | [15] |
|                        | Improved MRA and LDH activity in LL resulted in higher amounts of sarcoplasmic NADH in LL than in PM                                                                                          | [47] |
|                        | Ovine color-labile muscles had higher iron content and took less time for them to reach the threshold point below a* < 3.5, which determined consumer's rejection                             | [48] |
|                        | A higher abundance of glycolytic enzymes such as triosephosphate isomerase, $\beta$ -enolase, and creatine kinase in the OSM explained its improved color compared to ISM                     | [52] |
|                        | Higher GAPDH activity in ovine LL was responsible for NADH production, which could have been further used for metmyoglobin reduction, enhancing muscle color                                  | [14] |
|                        | Smaller cytochrome c content found in the sarcoplasm of LL, due to lower mitochondrial damage by reactive oxygen species (ROS) suggested better color behavior than PM                        | [8]  |
|                        | LL muscle was categorized as color stable due to lower oxygen consumption rates, higher myoglobin-reducing activity, and higher mitochondrial respiration ratio than PM                       | [9]  |
|                        | LL muscle showed higher MRA and predominantly white fibers than PM                                                                                                                            | [51] |
|                        | LL exhibited higher color values, less lipid and protein oxidation, and higher MRA than PM in Bos indicus cattle                                                                              | [45] |

|                         |                                                                                                                                                                                                                                     |      |
|-------------------------|-------------------------------------------------------------------------------------------------------------------------------------------------------------------------------------------------------------------------------------|------|
|                         | Color-stable muscles showed lower oxygen consumption rates, myoglobin content and oxidative rancidity than muscles with lower color stability                                                                                       | [41] |
|                         | Higher mitochondrial-mediated metmyoglobin reduction was associated with improved color values in LL than in PM                                                                                                                     | [10] |
|                         | LL showed higher concentration of antioxidant proteins, which had an important role in preventing both lipid and myoglobin oxidation, compared to PM                                                                                | [46] |
| <b>Breed</b>            | Brahman cattle showed higher temperament variations than Angus cattle, which affected ADG values and resulted in lower muscle colors                                                                                                | [2]  |
|                         | Lower L*, a* and b* values were obtained in Holstein Friesian meat compared to the criollo Caracu breed or Nellore cattle                                                                                                           | [56] |
|                         | Braford cattle showed more excitable behavior than pure Hereford cattle, but no associations were observed with meat color                                                                                                          | [55] |
|                         | Crossbreeding resulted in lower meat L*, a* and b* values than the pure breeds when animals were pasture-finished                                                                                                                   | [57] |
|                         | Nellore x Aberdeen Angus animals exhibited lower color values and higher pH values in meat when compared with pure Nellore cattle                                                                                                   | [58] |
|                         | Aggressive behavior from native African Bos indicus cattle breeds, especially from Red Bororo cattle was correlated with higher injury frequency                                                                                    | [60] |
|                         | More bruises in crossbreed cattle were associated with higher pH values and lower meat color values                                                                                                                                 | [61] |
|                         | Predominant Brahman animals and their crosses showed that 37% of the cattle had bruises on the carcass, due to nervous temperament and longer lairage times                                                                         | [62] |
| <b>Slaughter weight</b> | Heavier carcasses from Charolais cattle, kept under similar experimental conditions showed higher a*, b* and C* values and lower L*; which suggested that genetics alone do not always produce carcasses with higher color readings | [20] |
|                         | Heavier carcasses showed faster pH decline and slower temperature decline, which passed through the hot-rigor temperature window (pH=6 at temperature >35°C)                                                                        | [64] |
|                         | Significant lower L* values were recorded from bull's rather than from young bull's                                                                                                                                                 | [60] |

|     |                                                                                                                                                                                                                             |       |
|-----|-----------------------------------------------------------------------------------------------------------------------------------------------------------------------------------------------------------------------------|-------|
|     | meat, even if bulls were 90 kilograms heavier than young bulls                                                                                                                                                              |       |
|     | Continuous growth of animals during the finishing phase produced heavier carcasses, which also resulted in higher L* and a* values                                                                                          | [37]  |
|     | <i>Ad libitum</i> concentrate offered to the animals from the start of the finishing phase produced heavier animals in less time than when concentrates were offered <i>ad libitum</i> in the middle of the finishing phase | [112] |
| Sex | Improved color scores were found in steers slaughtered in different seasons across one year, but no difference was observed between cows and bulls                                                                          | [72]  |
|     | Animal gender status influenced meat color, which was related to different marbling and fat deposition values in LL of heifers and castrated cattle                                                                         | [68]  |
|     | Bulls' meat had higher L* and a* values than heifers, despite of higher intramuscular fat amounts found in heifers                                                                                                          | [38]  |
|     | Higher incidence of DFD meat in males than in females; however, when backfat carcass classification scores were low, female had higher incidence of DFD than male cattle                                                    | [67]  |
|     | The likelihood of obtaining DFD meat was higher for heifers than for steers. However, heifers that received MGA were less prone to problems related to DFD meat                                                             | [65]  |
|     | Bulls were more sensitive to stress parameters and showed faster glycogen depletion than heifers                                                                                                                            | [69]  |
|     | Steers showed a 47% higher incidence to have DFD-related problems in meat than heifers after animals traveled 36 hours to the abattoir                                                                                      | [70]  |
|     | Heifers showed more excitable behavior than steers; however, temperament was not related to meat color                                                                                                                      | [71]  |
|     | DFD beef had a higher metabolic activity that might result in higher MRA and lower color values                                                                                                                             | [29]  |
|     | HNE generation decreases both electron-transport-mediated MRA and NADH-dependent metmyoglobin reductase activity                                                                                                            | [81]  |
|     | Lipid oxidation was related to pigment oxidation and to the generation of off-odors and off-flavors in meat                                                                                                                 | [73]  |
|     | Fresh meat's color and pH of were not influenced by $\alpha$ -tocopherol amounts                                                                                                                                            | [91]  |

|  |                                                                                                                                                                                         |      |
|--|-----------------------------------------------------------------------------------------------------------------------------------------------------------------------------------------|------|
|  | Pasture-based animals had higher n-3 PUFA concentrations, which can increase the susceptibility to lipid oxidation processes                                                            | [75] |
|  | $\alpha$ -tocopherol concentrations were effective in reducing the lipid oxidation values in beef muscle, which was higher for animals finished in grass-based diets                    | [76] |
|  | There was a diet-related effect in vitamin E concentrations in the meat of grass-fed cattle, which resulted in higher protection against lipid oxidation                                | [43] |
|  | Higher deposition of natural antioxidants in the meat of silage-based animals was a result of three-fold higher $\alpha$ -tocopherol concentration in grass-silage than in normal grass | [80] |
|  | Vitamin C addition in minced meat reduced lipid oxidation processes in the meat from grain-fed cattle, but not in grass-fed animals                                                     | [74] |

**Table S2:** Summary of the papers related to the influence of extrinsic factors on meat color.

| Main Topic                            | Main Ideas                                                                                                                                                                                                        | Publication |
|---------------------------------------|-------------------------------------------------------------------------------------------------------------------------------------------------------------------------------------------------------------------|-------------|
| <b>Slaughtering season</b>            | Prolonged showering time (2 hours, water temperature 10-15°C) during winter increased animal pre-mortem stress and resulted in lower color values in meat                                                         | [103]       |
|                                       | Cattle had lower L*, a*, and b* values and higher pH during the summer months than in any other season                                                                                                            | [104]       |
|                                       | Significantly lower L*, a*, and b* values were recorded in meat during the hot season than those from the cool season                                                                                             | [105]       |
| <b>Production systems and feeding</b> | Changing the management system in the animals after weaning for 145 days produced meat with lower L* and higher a* for the intensive system, possibly due to higher pH and higher myoglobin content in their meat | [77]        |
|                                       | At similar carcass weight, concentrate-fed cattle showed higher L* and similar a* and pH values than grass-fed animals                                                                                            | [83]        |
|                                       | The highest meat a* values were attained at 0.8 % BW concentrate implementation in grass-based diets                                                                                                              | [82]        |
|                                       | Grazing periods up to 98 days during the finishing phase had no effects on meat color                                                                                                                             | [84]        |
|                                       | Confinement in cattle resulted in significantly higher L* values in meat and higher non-significant a* scores                                                                                                     | [89]        |

|                          |                                                                                                                                                                                                                                           |       |
|--------------------------|-------------------------------------------------------------------------------------------------------------------------------------------------------------------------------------------------------------------------------------------|-------|
|                          | Increasing the feeding intensity during growing and finishing did not show differences in pH or meat color                                                                                                                                | [85]  |
|                          | Significant lower L* and a* values were recorded for grass-fed compared to grain-fed cattle                                                                                                                                               | [86]  |
|                          | Significant higher L* and non-significant a* values were recorded in the meat of grass-fed cattle                                                                                                                                         | [87]  |
|                          | Grain-based diets in cattle resulted in higher slaughter weight than grass-based diets                                                                                                                                                    | [88]  |
|                          | Extensive systems produced a higher amount of type I red muscle fibers, due to higher vascularization and more oxidative metabolism than intensive-systems                                                                                | [90]  |
| <b>Pre-mortem stress</b> | Lairage time and improper desensitization can increase the risk of obtaining DFD meat, while fatter animals with improved backfat thickness decreased the risk of high-pH meat                                                            | [97]  |
|                          | Animals that traveled long distances and spent short lairage times showed higher enzymatic activity (creatine kinase and lactate dehydrogenase); however enzymatic activity was related to animal stress, but not related to meat quality | [32]  |
|                          | More than 17 hours of lairage time was the optimal treatment to recover muscle glycogen levels and thus, to prevent the incidence of DFD meat in bulls                                                                                    | [31]  |
|                          | Higher HSPA1A and cortisol levels were recorded when more than a single shot was used for stunning the animals                                                                                                                            | [102] |
|                          | There was no effect on pH, meat color, or WBSF when increasing lairage time from 3 to 12 hours, probably due to slow ruminant digestion                                                                                                   | [59]  |
|                          | More temperamental cattle showed higher plasma cortisol and glucose amounts                                                                                                                                                               | [56]  |
|                          | Fasting duration during lairage time did not affect meat color or meat ultimate pH, but feeding the animals before slaughtering increased carcass weight by 1.2%                                                                          | [95]  |
|                          | Increased transportation times produced higher meat pH, which was related to depleted glycogen stores in muscle                                                                                                                           | [98]  |
|                          | Extreme weather conditions and the mixing of strange animals increased the rate of incidence of DFD meat                                                                                                                                  | [67]  |
|                          | Increasing the stress factors such as longer transportation or lairage times also                                                                                                                                                         | [106] |

|                       |                                                                                                                                                                                                           |       |
|-----------------------|-----------------------------------------------------------------------------------------------------------------------------------------------------------------------------------------------------------|-------|
|                       | increased the incidence of obtaining DFD meat in the hot season                                                                                                                                           |       |
|                       | Short transportation periods increased animal stress, however, the amounts of LDH and CK collected in blood showed no associations with meat color                                                        | [33]  |
|                       | After long transportation distances (1800 km), lairage times of 72 hours reduced the incidence of DFD by 40%, instead of 90% when lairage time was only 24 hours or 60% when animals rested for 48 hours. | [94]  |
|                       | Reducing lairage time from 18 to 3 hours did not affect meat pH, due to journeys lesser than 6 hours                                                                                                      | [100] |
|                       | There were no significant effects on meat pH values when animals were not stunned or electrically or percussively stunned                                                                                 | [101] |
| <b>Chilling rates</b> | Fast chilling of carcasses negatively affected the textural properties in lamb carcasses and had reduced color values than samples chilled by the conventional method                                     | [110] |
|                       | High-rigor temperature increased muscles' shrinkage and improved light scattering, which produced brighter muscle color                                                                                   | [109] |
|                       | ISM muscle showed better color values than OSM, probably due to slower chilling rates which caused a faster pH decline                                                                                    | [53]  |
|                       | Rapid temperature fall in beef carcasses might result in slow glycolysis and high pH values, which can result in DFD meat                                                                                 | [96]  |
|                       | The high-rigor temperature might occur more frequently in grain-based cattle, due to the production of heavier and fatter animals than in grass-based production systems                                  | [107] |
|                       | As animals spent more time under feedlot production systems, carcasses had a higher risk of experiencing high-rigor temperatures                                                                          | [108] |
|                       | Under commercial conditions, carcasses were more susceptible to experiencing cold-shortening than high-rigor temperatures                                                                                 | [111] |
